# Supplementary material for: Comprehensive study of autoignition characteristics of propane
Source: PeerJ journal article supplement (doi:10.7717/peerj-pchem.29), 2023-06-19
Supplement: DataS1.xlsx [file DataS1.xlsx]

## Sheet: Intro
	Supplementary Data: Comprehensive Study of Auto-ignition Characteristics of Propane
	Please click below the links to see the relevant figures data.
	Figure 3
	Figure 4
	Figure 5
	Figure 6
	Figure 7
	Figure 8
	Figure 9
	Figure 10

## Sheet: Figure 3
	Data for Figure 3 - Numerical Simulation						Experimental Data for Figure 3
	Temperature (1000/T)	P = 1 atm	P = 4 atm	P = 10 atm			Temperature (1000/T)	Experiment @ P = 1	Temperature (1000/T)	Experiment @ P = 4	Temperature (1000/T)	Experiment @ P = 10
	1/K	μsec	μsec	μsec			1/K	μsec	1/K	μsec	μsec	μsec
	1.17647	1590680	361934	125498			0.77979	1086.3	0.91912	4363.95	0.75706	160.64
	1.11111	473457	117846	45970			0.77754	1045.72	0.8507	1415.92	0.83647	506.713
	1.05263	163454	41589	16881.7			0.6475	65.0481	0.88842	2164.79	0.89863	1207.81
	1	66402.5	16520.5	6752.19			0.67449	105.72	0.79815	611.48	0.96237	1855.89
	0.95238	31725.2	7523.31	3004.74			0.69686	188.853	0.72088	157.994	1.03413	3487.97
	0.90909	17025.2	3937.51	1507.8			0.85114	3088.01	0.69556	75.4902
	0.86957	9480.39	2289.28	851.822			0.75884	675.591
	0.83333	5185.22	1389.97	524.147			0.81987	1742.62
	0.8	2768.92	836.602	333.807
	0.76923	1466.96	490.776	211.271
	0.74074	783.825	283.152	131.042
	0.71429	428.377	163.336	80.1501
	0.68966	242.357	95.4478	48.9673
	0.66667	143.475	57.1929	30.2609
	0.64516	89.2529	35.4419	19.1045

## Sheet: Figure 4
	Data for Figure 4 (a)								Data for Figure 4 (b)
	Temperature (1000/T)	ARAMCO 2.0 IDT	ARAMCO 3.0 IDT	POLIMI Mech IDT	GRI Mech 3.0 IDT	San Diego IDT	USC Mech 2.0 IDT		Temperature (1000/T)	ARAMCO 2.0 IDT	ARAMCO 3.0 IDT	POLIMI Mech IDT	GRI Mech 3.0 IDT	San Diego IDT	USC Mech 2.0 IDT
	1/K	μsec	μsec	μsec	μsec	μsec	Μsec		1/K	μsec	μsec	μsec	μsec	μsec	Μsec
	1.17647	1652580	1590680	1899300	19419600	1437160	1014790		1.17647	412531	361934	493504	4699020	361983	287699
	1.11111	494645	473457	564809	5916240	407103	308895		1.11111	123202	117846	141840	1459370	114681	86645.9
	1.05263	177601	163454	203069	1853830	137541	112647		1.05263	43427.6	41589	49755.4	497301	39910.7	31382
	1	74890.6	66402.5	85612.2	577086	57064.9	47213		1	18024.4	16520.5	20704.9	176478	16090.9	13305.8
	0.95238	35673.8	31725.2	40435	177774	27720	21888.1		0.95238	8655.24	7523.31	9865.54	63151.5	7715.54	6361.67
	0.90909	18174	17025.2	20177.4	55293.4	14409.1	10859		0.90909	4630.5	3937.51	5143.89	22590.1	4201.39	3296.74
	0.86957	9415.52	9480.39	10102.7	17906.2	7567.35	5584.11		0.86957	2622.98	2289.28	2796.69	8157.86	2389.9	1790.17
	0.83333	4859.28	5185.22	4980.08	6212.03	3977.99	2906.64		0.83333	1503.4	1389.97	1524.89	3034.65	1350.73	992.572
	0.8	2511.68	2768.92	2442.88	2354.67	2111.05	1521.13		0.8	852.819	836.602	820.157	1188.47	755.692	554.121
	0.76923	1314.59	1466.96	1214.18	985.799	1141.78	805.134		0.76923	479.772	490.776	437.781	498.552	423.71	311.223
	0.74074	703.256	783.825	621.529	457.034	633.311	435.334		0.74074	270.581	283.152	235.416	226.536	240.753	177.266
	0.71429	387.666	428.377	332.065	234.088	361.727	243.201		0.71429	154.61	163.336	129.436	111.838	139.483	103.398
	0.68966	222.462	242.357	186.696	131.621	213.388	141.982		0.68966	90.3636	95.4478	73.6718	60.0286	82.8029	62.2944
	0.66667	133.214	143.475	111.214	80.3624	130.321	87.2941		0.66667	54.3869	57.1929	43.7224	34.785	50.5383	38.9838
	0.64516	84.1469	89.2529	70.1252	52.6647	82.4733	56.763		0.64516	33.943	35.4419	27.0634	21.6785	31.8447	25.3805
	Data for Figure 4 (c)								Data for Figure 4 (d)						Experimental Data for Figure 4
	Temperature (1000/T)	ARAMCO 2.0 IDT	ARAMCO 3.0 IDT	POLIMI Mech IDT	GRI Mech 3.0 IDT	San Diego IDT	USC Mech 2.0 IDT		Temperature (1000/T)	ARAMCO 3.0 IDT	POLIMI Mech IDT	GRI Mech 3.0 IDT			Temperature (1000/T)	Experiment @ P = 1	Temperature (1000/T)	Experiment @ P = 4	Temperature (1000/T)	Experiment @ P = 10
	1/K	μsec	μsec	μsec	μsec	μsec	Μsec		1/K	μsec	μsec	μsec			1/K	μsec	1/K	μsec	μsec	μsec
	1.17647	161442	125498	196795	1864500	126391	133121		1.17647	41037.9	56142.8	636262			0.77979	1086.3	0.91912	4363.95	0.75706	160.64
	1.11111	49781.6	45970	53933.5	560917	46487.7	39484.2		1.11111	15033.2	15141.7	184552			0.77754	1045.72	0.8507	1415.92	0.83647	506.713
	1.05263	17466.3	16881.7	18006	190396	17296.8	14048.3		1.05263	5466.23	4799.43	60567.4			0.6475	65.0481	0.88842	2164.79	0.89863	1207.81
	1	7114.04	6752.19	7133.75	70042	7034.23	5863.5		1	2156.8	1752.28	22010			0.67449	105.72	0.79815	611.48	0.96237	1855.89
	0.95238	3353.23	3004.74	3265.26	26883.8	3262.33	2791.49		0.95238	949.445	724.491	8627.54			0.69686	188.853	0.72088	157.994	1.03413	3487.97
	0.90909	1791.26	1507.8	1673.56	10510	1745.55	1462.24		0.90909	468.241	334.599	3557.18			0.85114	3088.01	0.69556	75.4902
	0.86957	1043.46	851.822	924.211	4153.41	1024.67	813.036		0.86957	256.599	171.157	1515.38			0.75884	675.591
	0.83333	633.296	524.147	528.392	1668.82	614.038	466.332		0.83333	153.034	95.9015	661.328			0.81987	1742.62
	0.8	385.969	333.807	303.267	691.222	362.238	270.874		0.8	96.3791	57.4788	295.557
	0.76923	232.493	211.271	172.572	299.974	211.05	158.279		0.76923	62.1956	35.6525	136.065
	0.74074	138.654	131.042	97.8934	138.247	123.137	93.409		0.74074	40.2906	22.2881	65.1301
	0.71429	82.7772	80.1501	56.035	68.2548	72.7078	56.1442		0.71429	26.0367	13.9137	32.7179
	0.68966	49.9254	48.9673	32.7546	36.2419	43.8006	34.6486		0.68966	16.8262	8.70851	17.3697
	0.66667	30.6663	30.2609	19.7163	20.6374	27.0207	22.0706		0.66667	10.9435	5.51809	9.78035
	0.64516	19.3179	19.1045	12.2853	12.5632	17.1038	14.5768		0.64516	7.21016	3.55769	5.83747

## Sheet: Figure 5
	Data for Figure 5 (a)					Data for Figure 5 (b)					Data for Figure 5 (c)					Data for Figure 5 (d)
	Temperature (1000/T)	ARAMCO 3.0 IDT	POLIMI Mech IDT	GRI Mech 3.0 IDT		Temperature (1000/T)	ARAMCO 3.0 IDT	POLIMI Mech IDT	GRI Mech 3.0 IDT		Temperature (1000/T)	ARAMCO 3.0 IDT	POLIMI Mech IDT	GRI Mech 3.0 IDT		Temperature (1000/T)	ARAMCO 3.0 IDT	POLIMI Mech IDT	GRI Mech 3.0 IDT
	1/K	μsec	μsec	μsec		1/K	μsec	μsec	μsec		1/K	μsec	μsec	μsec		1/K	μsec	μsec	μsec
	1.17647	2229980	1517200	17837600		1.17647	567008	423702	4314420		1.17647	228463	193555	1751210		1.17647	67688.6	83802.3	625786
	1.11111	652142	421100	5289660		1.11111	166961	117300	1275450		1.11111	69790.3	53232.3	501861		1.11111	23782.6	22709.8	174559
	1.05263	224910	137977	1638020		1.05263	57372.2	38231.1	421648		1.05263	24272.1	17270.8	163920		1.05263	8584.63	7250.86	55657.9
	1	88912.7	52380.4	507995		1	22792.1	14421.2	147921		1	9723.28	6480.92	58824.3		1	3421.86	2681.9	19827.5
	0.95238	38616.7	22015.4	156392		0.95238	10247.2	6229.33	53042.7		0.95238	4443.09	2769	22358.9		0.95238	1535.59	1129.43	7692.44
	0.90909	17568.3	9548.77	48567.3		0.90909	5023.69	2998.52	19143.7		0.90909	2255.72	1329.98	8766.79		0.90909	771.452	532.629	3172.15
	0.86957	8094.72	4079.27	15656.3		0.86957	2570.27	1516.49	6981.5		0.86957	1221.54	699.621	3501.82		0.86957	424.362	276.921	1365.29
	0.83333	3755.75	1707.72	5392.3		0.83333	1327.54	761.968	2616.4		0.83333	676.734	384.113	1426.13		0.83333	247.13	155.558	606.875
	0.8	1773.45	710.941	2026.89		0.8	684.326	373.556	1029		0.8	373.565	210.45	598.398		0.8	147.285	91.5402	277.759
	0.76923	861.216	302.219	842.369		0.76923	354.498	180.85	432.512		0.76923	204.361	113.112	262.517		0.76923	87.83	54.6063	131.366
	0.74074	434.067	137.676	388.425		0.74074	186.458	88.2558	196.602		0.74074	111.783	60.155	122.046		0.74074	52.0367	32.3352	64.625
	0.71429	229.463	69.706	198.374		0.71429	100.599	44.4014	97.1917		0.71429	61.8949	32.1637	60.6743		0.71429	30.8005	18.954	33.311
	0.68966	127.898	40.1023	111.48		0.68966	56.2342	23.5576	52.1674		0.68966	35.092	17.5893	32.3643		0.68966	18.3676	11.1441	18.0893
	0.66667	76.2739	25.555	68.4012		0.66667	32.7676	13.3864	30.288		0.66667	20.4868	9.95951	18.4998		0.66667	11.1392	6.63823	10.3923
	0.64516	48.3159	17.6015	45.0355		0.64516	20.017	8.24904	18.8668		0.64516	12.4281	5.92301	11.2652		0.64516	6.8908	4.03938	6.28436

## Sheet: Figure 6
	Data for Figure 6 (a)					Data for Figure 6 (b)					Data for Figure 6 (c)					Data for Figure 6 (d)
	Temperature (1000/T)	ARAMCO 3.0 IDT	POLIMI Mech IDT	GRI Mech 3.0 IDT		Temperature (1000/T)	ARAMCO 3.0 IDT	POLIMI Mech IDT	GRI Mech 3.0 IDT		Temperature (1000/T)	ARAMCO 3.0 IDT	POLIMI Mech IDT	GRI Mech 3.0 IDT		Temperature (1000/T)	ARAMCO 3.0 IDT	POLIMI Mech IDT	GRI Mech 3.0 IDT
	1/K	μsec	μsec	μsec		1/K	μsec	μsec	μsec		1/K	μsec	μsec	μsec		1/K	μsec	μsec	μsec
	1.17647	1042710	693967	18471800		1.17647	255708	192601	4597900		1.17647	96429.5	88314.6	1802680		1.17647	23368.4	38455.5	605222
	1.11111	310448	194919	5758970		1.11111	76973.8	53183	1494250		1.11111	30528.5	24124.3	574594		1.11111	9418.81	10350.7	186039
	1.05263	109707	65353	1826980		1.05263	27048	17310	521519		1.05263	10787.5	7749.86	203311		1.05263	3593.84	3269.61	64102.5
	1	45466.7	25852.3	569340		1	11101.2	6564.82	186065		1	4376.07	2873.97	76400.5		1	1465.44	1188.46	24182.2
	0.95238	21679.3	11888	173424		0.95238	5279.13	2890.88	65900.5		0.95238	2043.99	1218.22	29354.3		0.95238	667.128	489.001	9702.44
	0.90909	11474.9	6194.22	53045.7		0.90909	2849.79	1462.46	23054.9		0.90909	1089.42	589.032	11287.5		0.90909	342.669	225.156	4030.1
	0.86957	6431.69	3474.93	16958.6		0.86957	1681.59	824.185	8104.52		0.86957	647.173	321.742	4335.15		0.86957	197.267	115.508	1703.62
	0.83333	3693.64	1977.44	5855.56		0.83333	1037.32	494.093	2943.64		0.83333	412.6	192.737	1685.57		0.83333	124.639	65.6134	729.401
	0.8	2153.14	1109.51	2225.71		0.8	647.656	301.751	1133.62		0.8	271.153	121.449	677.253		0.8	83.7267	40.5578	317.977
	0.76923	1274.23	613.693	938.511		0.76923	405.11	183.814	471.114		0.76923	178.869	77.7307	286.741		0.76923	57.881	26.4816	142.74
	0.74074	765.811	337.282	439.027		0.74074	254.519	111.698	213.214		0.74074	117.617	49.7844	129.766		0.74074	40.2027	17.7435	66.8278
	0.71429	467.551	186.608	226.656		0.71429	161.363	68.1829	105.225		0.71429	77.4239	31.9568	63.2603		0.71429	27.8202	11.9853	32.9838
	0.68966	290.258	105.652	128.152		0.68966	103.525	42.0416	56.5565		0.68966	51.282	20.6921	33.2825		0.68966	19.2196	8.14077	17.2983
	0.66667	184.38	62.3336	78.5532		0.66667	67.3431	26.333	32.8319		0.66667	34.3164	13.5807	18.8927		0.66667	13.3304	5.58108	9.65495
	0.64516	120.371	38.682	51.833		0.64516	44.615	16.7959	20.4925		0.64516	23.2655	9.05479	11.483		0.64516	9.30283	3.87932	5.75136

## Sheet: Figure 7
	Data for Figure 7 (a)					Data for Figure 7 (b)					Data for Figure 7 (c)					Data for Figure 7 (d)
	Temperature (1000/T)	𝜑 = 0.5	𝜑 = 1	𝜑 = 2		Temperature (1000/T)	𝜑 = 0.5	𝜑 = 1	𝜑 = 2		Temperature (1000/T)	𝜑 = 0.5	𝜑 = 1	𝜑 = 2		Temperature (1000/T)	𝜑 = 0.5	𝜑 = 1	𝜑 = 2
	1/K	μsec	μsec	μsec		1/K	μsec	μsec	μsec		1/K	μsec	μsec	μsec		1/K	μsec	μsec	μsec
	1.17647	2229980	1590680	1042710		1.17647	567008	361934	255708		1.17647	228463	125498	96429.5		1.17647	67688.6	41037.9	23368.4
	1.11111	652142	473457	310448		1.11111	166961	117846	76973.8		1.11111	69790.3	45970	30528.5		1.11111	23782.6	15033.2	9418.81
	1.05263	224910	163454	109707		1.05263	57372.2	41589	27048		1.05263	24272.1	16881.7	10787.5		1.05263	8584.63	5466.23	3593.84
	1	88912.7	66402.5	45466.7		1	22792.1	16520.5	11101.2		1	9723.28	6752.19	4376.07		1	3421.86	2156.8	1465.44
	0.95238	38616.7	31725.2	21679.3		0.95238	10247.2	7523.31	5279.13		0.95238	4443.09	3004.74	2043.99		0.95238	1535.59	949.445	667.128
	0.90909	17568.3	17025.2	11474.9		0.90909	5023.69	3937.51	2849.79		0.90909	2255.72	1507.8	1089.42		0.90909	771.452	468.241	342.669
	0.86957	8094.72	9480.39	6431.69		0.86957	2570.27	2289.28	1681.59		0.86957	1221.54	851.822	647.173		0.86957	424.362	256.599	197.267
	0.83333	3755.75	5185.22	3693.64		0.83333	1327.54	1389.97	1037.32		0.83333	676.734	524.147	412.6		0.83333	247.13	153.034	124.639
	0.8	1773.45	2768.92	2153.14		0.8	684.326	836.602	647.656		0.8	373.565	333.807	271.153		0.8	147.285	96.3791	83.7267
	0.76923	861.216	1466.96	1274.23		0.76923	354.498	490.776	405.11		0.76923	204.361	211.271	178.869		0.76923	87.83	62.1956	57.881
	0.74074	434.067	783.825	765.811		0.74074	186.458	283.152	254.519		0.74074	111.783	131.042	117.617		0.74074	52.0367	40.2906	40.2027
	0.71429	229.463	428.377	467.551		0.71429	100.599	163.336	161.363		0.71429	61.8949	80.1501	77.4239		0.71429	30.8005	26.0367	27.8202
	0.68966	127.898	242.357	290.258		0.68966	56.2342	95.4478	103.525		0.68966	35.092	48.9673	51.282		0.68966	18.3676	16.8262	19.2196
	0.66667	76.2739	143.475	184.38		0.66667	32.7676	57.1929	67.3431		0.66667	20.4868	30.2609	34.3164		0.66667	11.1392	10.9435	13.3304
	0.64516	48.3159	89.2529	120.371		0.64516	20.017	35.4419	44.615		0.64516	12.4281	19.1045	23.2655		0.64516	6.8908	7.21016	9.30283

## Sheet: Figure 8
		Normalized Sensitivity Coefficient at T = 850 K
		Reactions	Sensitivity Coefficient	Sensitivity Coefficient
		T = 850 K	P = 1 atm	P = 4 atm
		C3H8 + OH <=> H2O + NC3H7	0.03178	0.0796
		NC3H7O2 <=> C3H6OOH1-2	0.04113	0.03498
		C3H8 + HO2 <=> H2O2 + NC3H7	0.3129	0.34494
		C3H8 + HO2 <=> H2O2 + IC3H7	0.7559	0.73711
		H2O2 (+M) <=> 2 OH (+M)	1	1
		2 HO2 <=> H2O2 + O2	-0.14332	-0.14257
		2 HO2 <=> H2O2 + O2	-0.40323	-0.40239
		NC3H7O2 <=> C3H6 + HO2	-0.0972	-0.20932
		C3H8 + OH <=> H2O + IC3H7	-0.06779	-0.10772
		C3H6 + O2 <=> C3H5-A + HO2	-0.01913	-0.01761
		C3H8 + CH3 <=> CH4 + IC3H7	-0.01684	-0.017
		C3H6 + HO2 <=> IC3H7 + O2	-0.01245	-0.01582
		CH3 + HO2 <=> CH4 + O2	-0.06764	-0.02629
		IC3H7O2 <=> C3H6 + HO2	-0.02061	-0.0341

## Sheet: Figure 9
		Normalized Sensitivity Coefficient at T = 1200 K
		Reactions	Sensitivity Coefficient	Sensitivity Coefficient
		T = 1200 K	P = 1 atm	P = 4 atm
		C3H5-A + HO2 <=> C3H5O + OH	0.25623	0.32182
		C3H8 (+M) <=> C2H5 + CH3 (+M)	0.72462	0.52359
		C3H8 + OH <=> H2O + IC3H7	0.23901	0.39654
		C3H8 + HO2 <=> H2O2 + IC3H7	0.25879	0.50512
		C2H4 + OH <=> C2H3 + H2O	0.31028	0.31566
		H + O2 <=> O + OH	0.79894	0.74636
		CH3 + HO2 <=> CH3O + OH	1	1
		C3H6 + H <=> IC3H7	-0.18666	-0.21191
		C3H8 + H <=> H2 + NC3H7	-0.54013	-0.4837
		2 CH3 (+M) <=> C2H6 (+M)	-0.47537	-0.46741
		2 HO2 <=> H2O2 + O2	-0.20705	-0.32191
		C3H6 + O2 <=> C3H5-A + HO2	-0.15001	-0.19398
		CH3 + HO2 <=> CH4 + O2	-0.75925	-0.79984
		C3H8 + OH <=> H2O + NC3H7	-0.48141	-0.57011
		C2H4 + CH3 <=> NC3H7	-0.16178	-0.26034
		C3H6 + OH <=> C3H5-A + H2O	-0.1509	-0.19056

## Sheet: Figure 10
		Normalized Sensitivity Coefficient at T = 1550 K
		Reactions	Sensitivity Coefficient	Sensitivity Coefficient
		T = 1550 K	P = 1 atm	P = 4 atm
		CH3 + HO2 <=> CH3O + OH	0.06108	0.2732
		C2H3 + O2 <=> CH2CHO + O	0.06301	0.15898
		H2O + O <=> 2 OH	0.06545	0.06855
		CO + OH <=> CO2 + H	0.24178	0.58774
		H + O2 <=> O + OH	0.48096	1
		H + OH + M <=> H2O + M	-0.33234	-0.53976
		C2H4 + OH <=> C2H3 + H2O	-0.25233	0.16075
		C2H3 + O2 <=> CHCHO + OH	-1	-0.16125
		2 CH3 (+M) <=> C2H6 (+M)	-0.05783	-0.10415
		C3H8 + H <=> H2 + NC3H7	-0.04152	-0.23729
